# Supplementary material
Source: PubMed Central journal article supplement (PMC7202130)

TCGA

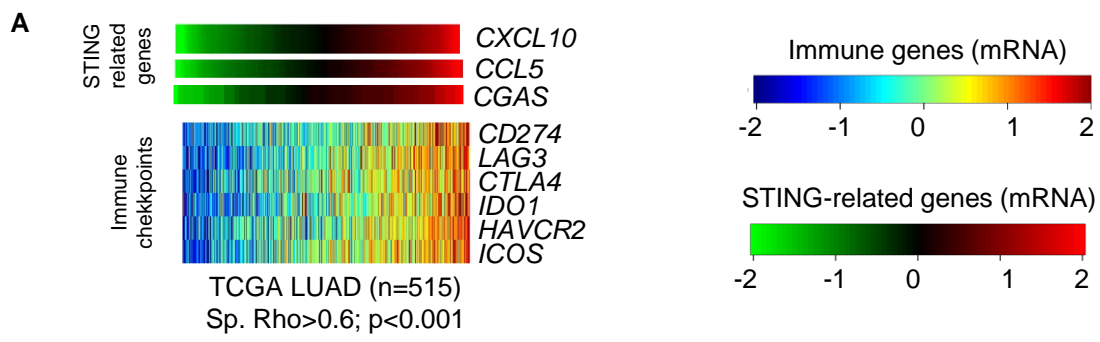

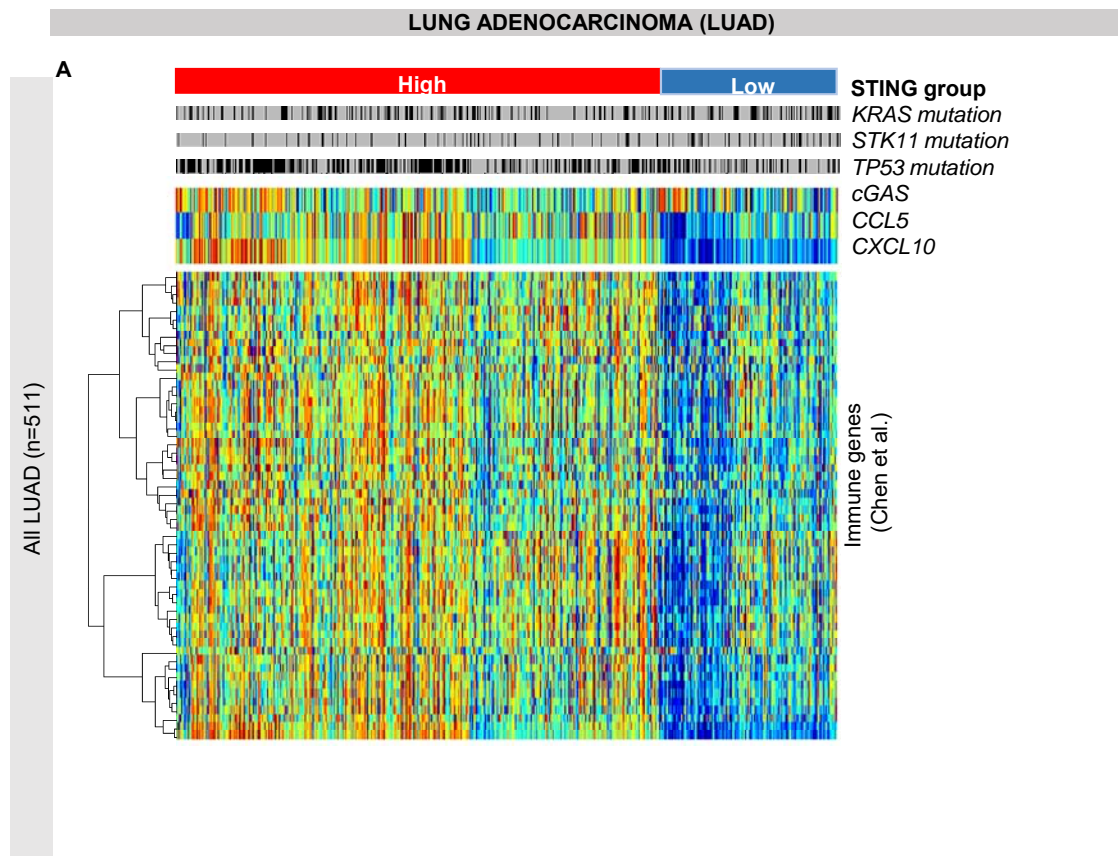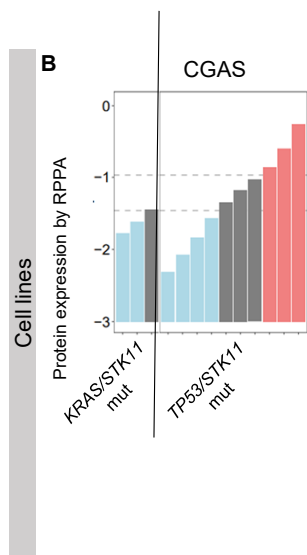

A

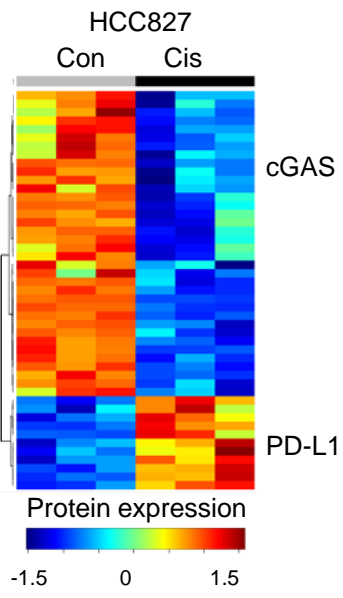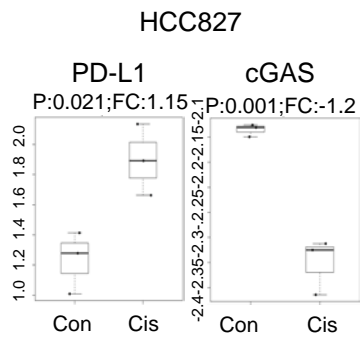

B

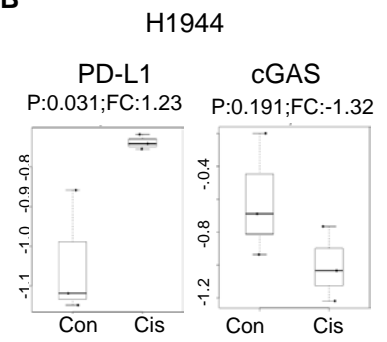

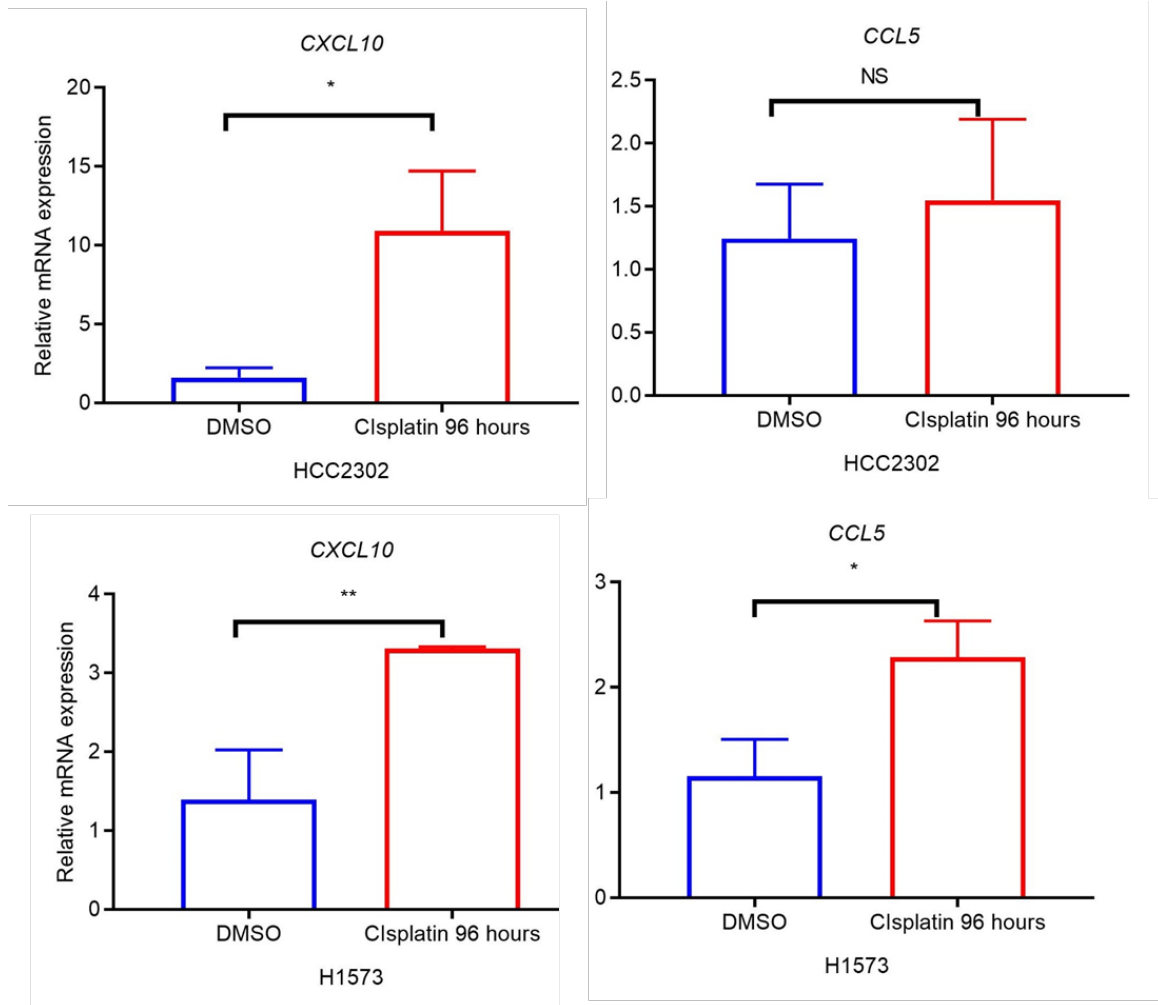

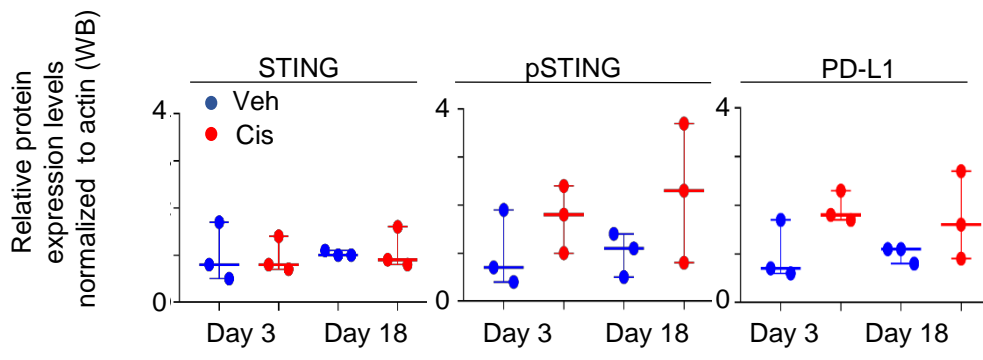

Supplemental Figure 6

LUNG SQUAMOUS (LUSC) TCGA clinical cohort

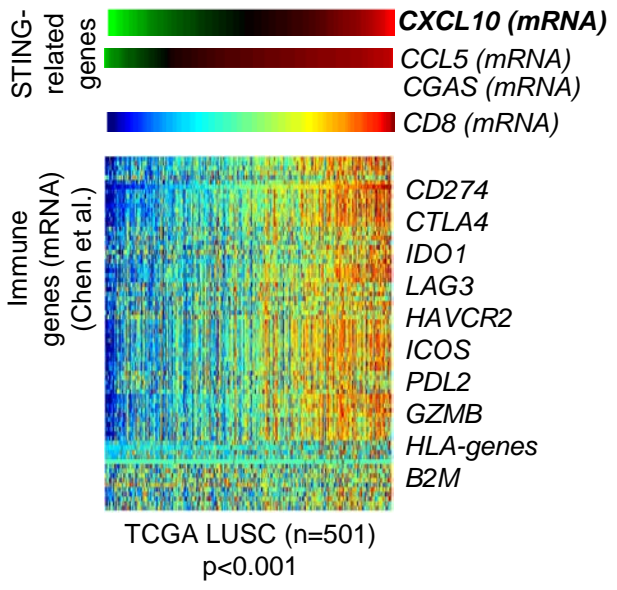

Supplement: NIHMS1573956-supplement-Supplemental_figures.pdf [file NIHMS1573956-supplement-Supplemental_figures.pdf]
